# Supplementary material
Source: ML conference proceedings conference paper supplement (https://aclanthology.org/2026.semeval-1.3)

ZHO-Valence

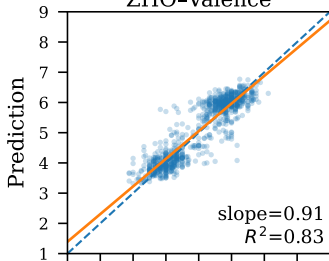

ZHO-Arousal

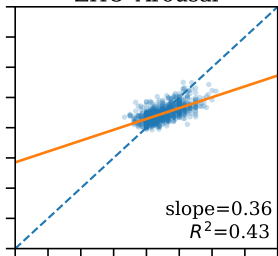

SWA-Valence

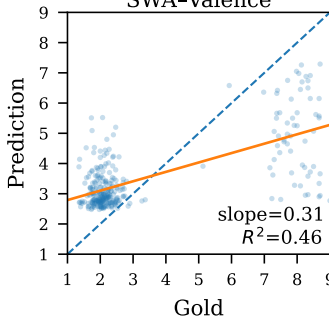

SWA-Arousal

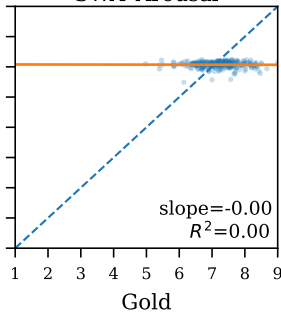

Supplement: SupplementaryMaterial [file fig_swa_vs_zho_compare.pdf › Overleaf_DimABSA 2026_NTNU_SMIL/figures/fig_swa_vs_zho_compare.pdf]
